# Supplementary material
Source: HighWire-hosted journal article supplement (https://gut.bmj.com/content/69/1/103)
Supplement: inline-supplementary-material-2 [file inline-supplementary-material-2.pdf]

## Supplementary Tables and Figures

**Supplementary Table 1 Peri-operative CRP in serial sampling study**

\* Paired Wilcoxon sign rank test used to compare levels.

| Time-point (days) | N  | Mean CRP mg/l (95%CI) | P*        |
|-------------------|----|-----------------------|-----------|
| Preoperative      | 70 | 13.5 (4.3-22.8)       | reference |
| Intraoperative    | 30 | 11.7 (-2.3-25.77)     | 0.37      |
| 1-2               | 39 | 100.6 (84.5-116.8)    | 1.60e-14  |
| 3-5               | 38 | 143.1 (118.4-167.8)   | 1.39e-12  |
| 6-9               | 31 | 77.5 (58.3-96.7)      | 1.96e-6   |
| 30-120            | 40 | 15.4 (3.1-27.7)       | 0.51      |
| >162              | 39 | 6.7 (3.4-10.0)        | 0.14      |

**Supplementary Table 2 Linear mixed-effects regression model for serial sampling study for association between 25OHD and sample time point before and after adjustment for contemporaneous CRP level**

Linear mixed model including age, AJCC, gender and BMI fitted as fixed effects and patient as a random effect.

\*Model additionally adjusted for CRP with estimated contribution of CRP to the adjusted model given.

| Time point     | Unadjusted |           | Adjusted for CRP |           |
|----------------|------------|-----------|------------------|-----------|
|                | Estimate   | P         | Estimate*        | P*        |
| Preoperative   | Reference  | Reference | Reference        | Reference |
| Intraoperative | -13.27     | 5.25e-05  | -13.81           | 7.78e-5   |
| 1-2 days       | -17.89     | 2.38e-13  | -18.50           | 5.52e-7   |
| 3-5 days       | -17.80     | 7.10e-13  | -17.20           | 6.38e-5   |
| 6-9 days       | -11.24     | 1.72e-05  | -11.33           | 0.002     |
| 30-120 days    | -6.90      | 0.004     | -6.11            | 0.04      |
| >162 days      | 17.48      | 3.04e-10  | 17.41            | 1.99e-8   |
| CRP            | NA         | NA        | 0.01             | 0.69      |

**Supplementary Table 3 Contribution of demographic and clinical factors to 25OHD level in Cohort 1 and Cohort 2**

3354 patients with complete data for all variables examined in linear regression models. Raw 25OHD used (i.e. not adjusted for seasonal variation), with model adjusted for sample time-point and sample month. Data on chemotherapy use was available for a subset of patients in each cohort (n=314 in cohort 1, n=1452 in cohort 2) yet was not associated with 25OHD after adjustment for other factors and so not included in the model.

|                           | Cohort 1 |         | Cohort 2 |         |
|---------------------------|----------|---------|----------|---------|
|                           | Estimate | P       | Estimate | P       |
| Age                       | -0.28    | 2.2e-10 | 0.02     | 0.77    |
| BMI                       | -0.45    | 1.7e-5  | -0.65    | 3.8e-9  |
| Gender (M)                | -0.74    | 0.42    | -1.72    | 0.15    |
| AJCC                      | -1.28    | 0.008   | -0.76    | 0.25    |
| Vitamin D supplements (Y) | 6.15     | 0.03    | 14.08    | 3.1e-16 |

**Supplementary Table 4 May-adjusted 25OHD levels in Cohort 1 and Cohort 2 stratified by sample time point**

*Difference in 25OHD assay in cohort 1 and cohort 2 precludes direct comparison between two cohorts. Time point categories given as months postoperatively; Mean May-adjusted 25OHD given as nmol/l with 95%CI; \*linear regression model using raw 25OHD adjusting for age; gender; BMI; AJCC; vitamin D supplement use and month of sampling; p value reflects comparison with 0-12 months postoperative sampling values. Preoperative samples taken up to 154 days before surgery, postoperative samples taken up to 7624 days from surgery. Full results with effect size estimates stratified by 12-month blocks given in table below.*

| Time point    | N           | CRC cohort 1 25OHD (nmol/l) | Est.* | P*   | N           | CRC cohort 2 25OHD (nmol/l) | Est.* | P*     |
|---------------|-------------|-----------------------------|-------|------|-------------|-----------------------------|-------|--------|
| <b>All</b>    | <b>2006</b> |                             |       |      | <b>2100</b> | <b>51.66 (50.51-52.81)</b>  | -     | -      |
| <b>Preop.</b> | -           | -                           | -     | -    | 560         | 54.8 (52.4-57.1)            | 7.27  | 1.2e-5 |
| <b>0-12</b>   | 1798        | 29.2 (28.3-30.1)            | ref   | ref  | 549         | 48.8 (46.6-51.0)            | ref   | ref    |
| <b>12-24</b>  | 180         | 30.1 (27.0-33.2)            | 93    | 0.35 | 396         | 50.4 (47.9-52.8)            | 2.17  | 0.22   |
| <b>&gt;24</b> | 28          | 37.8 (30.6-45.0)            | 2.54  | 0.56 | 595         | 52.2 (50.0-54.5)            | 4.81  | 0.002  |

**Supplementary Table 5 Survival analysis for all cause death in Cohort 1 and Cohort 2 stratified by 6-monthly sample time-point**

*Model adjusted for age, sex, AJCC stage, body mass index, tumour site (colon/rectum), body mass index, tumour site (colon/rectum), time between definitive treatment and sampling. Combined HR calculated by meta-analysis of Cohorts 1 and 2.*

|                      | N           | Tertile 1  | Tertile 3   |                  |               |
|----------------------|-------------|------------|-------------|------------------|---------------|
| <b>Cohort 1</b>      |             | HR         | HR          | 95% CI           | P             |
| <b>0-6 months</b>    | 1058        | ref        | 0.74        | 0.58-0.94        | 0.01          |
| <b>6-12 months</b>   | 286         | ref        | 0.56        | 0.36-0.86        | 0.01          |
| <b>12-18 months</b>  | 97          | ref        | 0.64        | 0.30-1.37        | 0.24          |
| <b>18-24 months</b>  | 29          | ref        | 1.25        | 0.1-13.38        | 0.85          |
| <b>&gt;24 months</b> | 16          | ref        | 0.14        | 0.001-3.38       | 0.49          |
| <b>All patients</b>  | <b>1486</b> | <b>ref</b> | <b>0.69</b> | <b>0.56-0.84</b> | <b>0.0002</b> |
| <b>Cohort 2</b>      |             | HR         | HR          | 95% CI           | P             |
| <b>Preop.</b>        | 464         | ref        | 0.30        | 0.12-0.71        | 0.006         |
| <b>0-6 months</b>    | 247         | ref        | 0.57        | 0.21-1.56        | 0.27          |
| <b>6-12 months</b>   | 203         | ref        | 0.99        | 0.28-3.42        | 0.98          |
| <b>12-18 months</b>  | 172         | ref        | 0.93        | 0.40-2.15        | 0.86          |
| <b>18-24 months</b>  | 171         | ref        | 0.64        | 0.28-8.71        | 0.62          |
| <b>&gt;24 months</b> | 535         | ref        | 0.66        | 0.36-1.20        | 0.17          |
| <b>All patients</b>  | 1792        | ref        | 0.63        | 0.44-0.89        | 0.01          |
| <b>Meta-analysis</b> |             | HR         |             |                  |               |
| <b>0-6 months</b>    | 1305        | ref        | 0.73        | 0.50-0.96        | -             |
| <b>6-12 months</b>   | 489         | ref        | 0.61        | 0.20-1.01        | -             |
| <b>12-18 months</b>  | 269         | ref        | 0.77        | 0.21-1.33        | -             |

|                      |     |     |      |            |   |
|----------------------|-----|-----|------|------------|---|
| <b>18-24 months</b>  | 199 | ref | 0.97 | -0.78-2.73 | - |
| <b>&gt;24 months</b> | 551 | ref | 0.64 | 0.05-1.23  | - |

**Supplementary Table 6 Survival analysis in Cohort 2 Preoperative patients adjusted for CRP**

| Model                  | N          | Tertile 1   | Tertile 2   |                  |             | Tertile 3   |                  |             |
|------------------------|------------|-------------|-------------|------------------|-------------|-------------|------------------|-------------|
|                        |            | <38.0nmol/l | HR          | 95% CI           | P           | >57.9nmol/l | HR               | 95% CI      |
| <i>CRC death</i>       |            |             |             |                  |             |             |                  |             |
| <b>unadjusted</b>      | 486        | ref         | 0.68        | 0.29-1.62        | 0.39        | 0.40        | 0.14-1.13        | 0.08        |
| <b>model 2 *</b>       | 460        | ref         | 0.69        | 0.28-1.67        | 0.41        | 0.43        | 0.15-1.30        | 0.14        |
| <b>model 3 †</b>       | <b>307</b> | <b>ref</b>  | <b>0.91</b> | <b>0.33-2.46</b> | <b>0.86</b> | <b>0.73</b> | <b>0.24-2.24</b> | <b>0.58</b> |
| <i>All-cause death</i> |            |             |             |                  |             |             |                  |             |
| <b>unadjusted</b>      | 485        | ref         | 0.71        | 0.39-1.32        | 0.28        | 0.33        | 0.15-0.74        | 0.24        |
| <b>model 2 *</b>       | 464        | ref         | 0.70        | 0.37-1.30        | 0.26        | 0.30        | 0.12-0.71        | 0.006       |
| <b>model 3 †</b>       | <b>307</b> | <b>ref</b>  | <b>0.79</b> | <b>0.39-1.60</b> | <b>0.51</b> | <b>0.38</b> | <b>0.15-0.98</b> | <b>0.04</b> |

NOTE. Final model is shown in bold. Abbreviations: 25OHD, 25-hydroxyvitamin D; CRC, colorectal cancer; HR, hazard ratio; Ref, reference. \*model adjusted for age, sex, AJCC stage, body mass index, tumour site (colon/rectum), time between definitive treatment and sampling. Where data were missing, participants were excluded from adjusted model. †Multivariate model additionally adjusted for CRP. Only 23 CRC deaths in patients included in Model 3 may contribute to lack of statistical significance seen.

**Supplementary Table 7 Survival analysis in Cohort 1 and Cohort 2 stratified by May-adjusted 25OHD level cut-off**

A recursive approach was taken to identify putative thresholds associated with overall survival and meta-analysis performed for those thresholds most strongly associated with survival.

| Cohort 1                  | HR   | P      | N above    |
|---------------------------|------|--------|------------|
| <b>25OHD&gt;10 nmol/l</b> | 0.72 | 0.002  | 1452 (86%) |
| <b>25OHD&gt;15 nmol/l</b> | 0.73 | 0.0003 | 1249 (74%) |
| <b>25OHD&gt;20 nmol/l</b> | 0.75 | 0.0003 | 1062 (63%) |
| <b>25OHD&gt;25 nmol/l</b> | 0.80 | 0.006  | 856 (51%)  |
| <b>25OHD&gt;30 nmol/l</b> | 0.80 | 0.008  | 682 (40%)  |
| <b>25OHD&gt;35 nmol/l</b> | 0.76 | 0.004  | 525 (31%)  |
| <b>25OHD&gt;40 nmol/l</b> | 0.74 | 0.004  | 402 (24%)  |
| <b>25OHD&gt;45 nmol/l</b> | 0.71 | 0.004  | 301 (18%)  |
| <b>25OHD&gt;50 nmol/l</b> | 0.76 | 0.05   | 220 (13%)  |
| <b>25OHD&gt;55 nmol/l</b> | 0.84 | 0.22   | 164 (10%)  |
| Cohort 2                  | HR   | P      | N above    |
| <b>25OHD&gt;10 nmol/l</b> | 1.11 | 0.89   | 1823 (99%) |
| <b>25OHD&gt;15 nmol/l</b> | 0.74 | 0.45   | 1794 (97%) |
| <b>25OHD&gt;20 nmol/l</b> | 1.07 | 0.82   | 1738 (94%) |

|                      |           |              |            |
|----------------------|-----------|--------------|------------|
| 25OHD>25 nmol/l      | 0.80      | 0.29         | 1647 (89%) |
| 25OHD>30 nmol/l      | 0.70      | 0.03         | 1512 (82%) |
| 25OHD>35 nmol/l      | 0.77      | 0.08         | 1342 (73%) |
| 25OHD>40 nmol/l      | 0.72      | 0.02         | 1156 (63%) |
| 25OHD>45 nmol/l      | 0.80      | 0.11         | 968 (52%)  |
| 25OHD>50 nmol/l      | 0.67      | 0.008        | 792 (43%)  |
| 25OHD>55 nmol/l      | 0.69      | 0.02         | 682 (37%)  |
| 25OHD>60 nmol/l      | 0.65      | 0.01         | 569 (31%)  |
| 25OHD>65 nmol/l      | 0.78      | 0.16         | 477 (26%)  |
| 25OHD>70 nmol/l      | 0.83      | 0.34         | 384 (21%)  |
| <b>Meta-analysis</b> | <b>HR</b> | <b>95%CI</b> | <b>-</b>   |
| 25OHD>45 nmol/l      | 0.75      | 0.57-0.93    | -          |
| 25OHD>50 nmol/l      | 0.72      | 0.52-0.92    | -          |

**Supplementary Figure 1 Meta-analysis of 25OHD tertile 3 and tertile 1 with CRC-specific and all-cause mortality adjusted for CRP**

*Adjusted hazard ratios used for meta-analysis, adjusted for CRP, age, sex, AJCC stage, body mass index, tumour site (colon/rectum) and time between definitive treatment and sampling.*

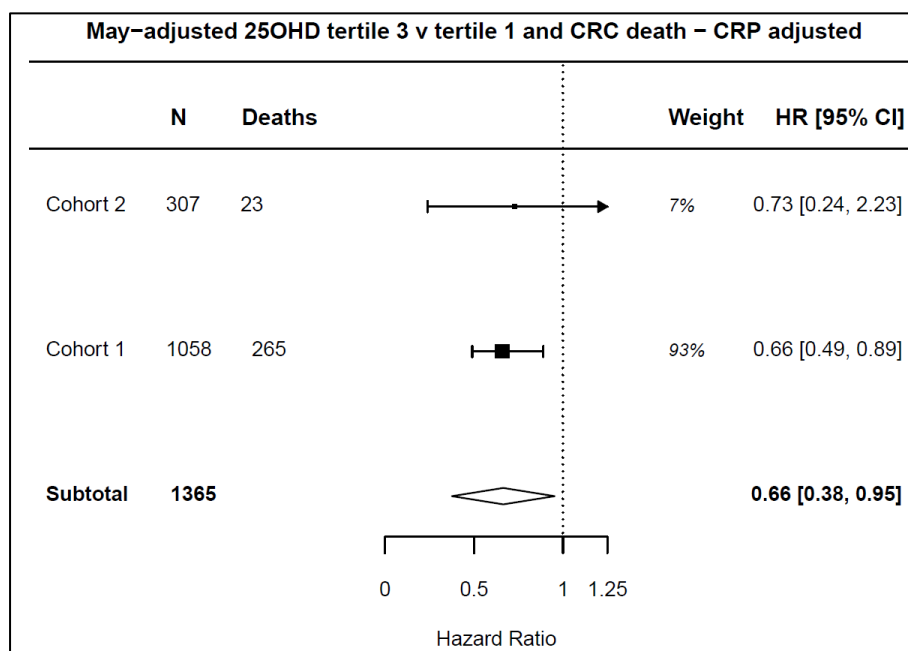

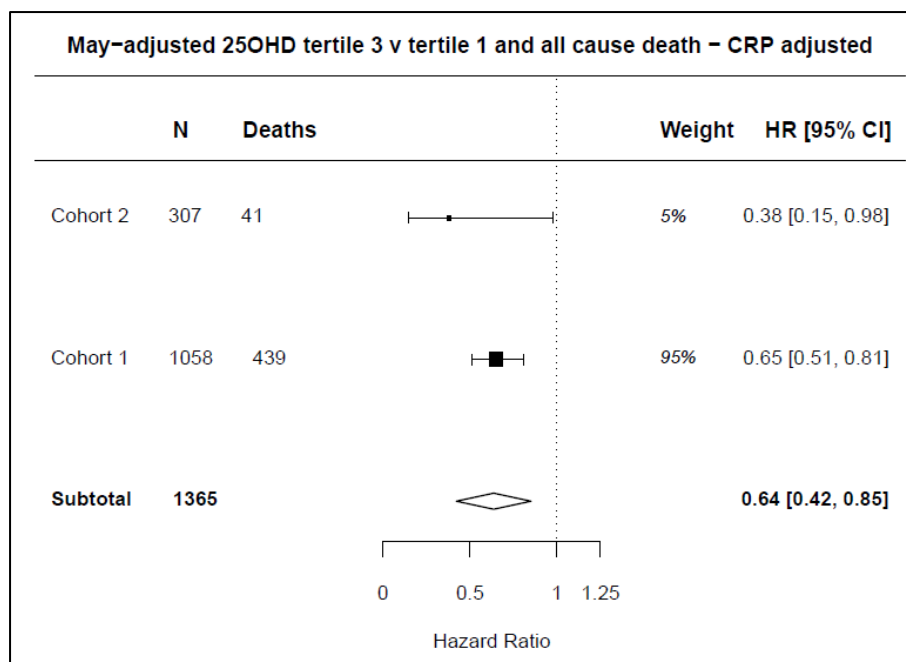

**Supplementary Table 8 Difference in survival between Cohort 1 and Cohort 2**  
Adjusted for age, gender, BMI, site, AJCC, sample time from surgery (< >12 months)

|                        | Cohort 1<br>Mean 25OHD 29.17 | Cohort 2<br>Mean 25OHD 46.89 |           |        |
|------------------------|------------------------------|------------------------------|-----------|--------|
| Model                  | HR                           | HR                           | 95% CI    | P      |
| <b>CRC death</b>       | ref                          | 0.58                         | 0.42-0.79 | 0.0005 |
| <b>All-cause death</b> | ref                          | 0.63                         | 0.49-0.80 | 0.0002 |

**Supplementary Table 9 Multivariable-adjusted analysis of HR of CRC mortality in Cohort 1 and Cohort 2 according to polymorphisms in VDR gene and their interaction with may-adjusted plasma 25OHD concentration**

Multivariate model adjusted for age, gender, AJCC, cancer site and BMI. For CRC Cohort 1 model was repeated with addition of CRP with the interaction term for rs11568820  $P = 0.003$  ( $n=1018$  cases included). For CRC Cohort 2 only 282 cases with full genotyping and CRP level were available and so CRP was not included as a covariate. No significant interaction seen for all cause death in Cohort 2, interaction  $P=0.002$  for all cause death in Cohort 1.

| SNP                                   | Model            | Cohort 1 |       |                   | Cohort 2 |       |                   |
|---------------------------------------|------------------|----------|-------|-------------------|----------|-------|-------------------|
|                                       |                  | SNP      | 25OHD | $P_{interaction}$ | SNP      | 25OHD | $P_{interaction}$ |
| <b>rs11568820</b><br>(AA or AG v GG†) | Simple           | 0.64     | 0.03  | -                 | 0.62     | 0.14  | -                 |
|                                       | With interaction | 0.12     | 0.002 | <b>0.02</b>       | 0.04     | 0.02  | <b>0.03</b>       |

**Supplementary Table 10 Survival analysis in Cohort 1 and Cohort 2 stratified by rs11568820 genotype**

*Multivariate model adjusted for age, gender, AJCC, cancer site, BMI and time to sampling.*

|                        |          | <b>Tertile 1</b><br><i>&lt;38.0nmol/l</i> | <b>Tertile 2</b><br><i>38.0-57.9nmol/l</i> |               |          | <b>Tertile 3</b><br><i>&gt;57.9nmol/l</i> |               |          |                |
|------------------------|----------|-------------------------------------------|--------------------------------------------|---------------|----------|-------------------------------------------|---------------|----------|----------------|
| <b>CRC death</b>       | <b>N</b> | <b>HR</b>                                 | <b>HR</b>                                  | <b>95% CI</b> | <b>P</b> | <b>HR</b>                                 | <b>95% CI</b> | <b>P</b> | <b>P trend</b> |
| <b>Cohort 1</b>        |          |                                           |                                            |               |          |                                           |               |          |                |
| rs11568820 AA/AG       | 546      | ref                                       | 1.36                                       | 0.89-2.07     | 0.15     | 1.11                                      | 0.72-1.71     | 0.65     | 0.49           |
| rs11568820 GG          | 871      | ref                                       | 0.69                                       | 0.50-0.94     | 0.02     | 0.54                                      | 0.38-0.77     | 5.7e-4   | 6.4e-4         |
| <b>Cohort 2</b>        |          |                                           |                                            |               |          |                                           |               |          |                |
| rs11568820 AA/AG       | 620      | ref                                       | 0.84                                       | 0.40-1.77     | 0.64     | 1.03                                      | 0.51-2.10     | 0.93     | 0.76           |
| rs11568820 GG          | 1090     | ref                                       | 0.67                                       | 0.41-1.09     | 0.11     | 0.43                                      | 0.24-0.77     | 0.005    | 0.015          |
| <b>Meta-analysis</b>   |          |                                           |                                            |               |          |                                           |               |          |                |
| rs11568820 AA/AG       | 1166     | ref                                       | 1.19                                       | 0.72-1.67     |          | 1.09                                      | 0.72-1.46     | -        | -              |
| rs11568820 GG          | 1961     | ref                                       | 0.68                                       | 0.42-0.95     |          | 0.51                                      | 0.21-0.81     |          |                |
| <b>All-cause death</b> | <b>N</b> | <b>HR</b>                                 | <b>HR</b>                                  | <b>95% CI</b> | <b>P</b> | <b>HR</b>                                 | <b>95% CI</b> | <b>P</b> | <b>P trend</b> |
| <b>Cohort 1</b>        |          |                                           |                                            |               |          |                                           |               |          |                |
| rs11568820 AA/AG       | 546      | ref                                       | 0.91                                       | 0.67-1.26     | 0.58     | 0.91                                      | 0.62-1.25     | 0.56     | 0.83           |
| rs11568820 GG          | 871      | ref                                       | 0.69                                       | 0.54-0.87     | 0.002    | 0.58                                      | 0.45-0.76     | 4.8e-5   | 1.5e-5         |
| <b>Cohort 2</b>        |          |                                           |                                            |               |          |                                           |               |          |                |
| rs11568820 AA/AG       | 620      | ref                                       | 1.12                                       | 0.64-1.97     | 0.69     | 0.87                                      | 0.48-1.56     | 0.64     | 0.89           |
| rs11568820 GG          | 1090     | ref                                       | 0.72                                       | 0.48-1.09     | 0.12     | 0.52                                      | 0.32-0.84     | 0.007    | 0.03           |
| <b>Meta-analysis</b>   |          |                                           |                                            |               |          |                                           |               |          |                |
| rs11568820 AA/AG       | 1136     | ref                                       | 0.96                                       | 0.68-1.24     |          | 0.90                                      | 0.62-1.18     | -        | -              |
| rs11568820 GG          | 1934     | ref                                       | <b>0.70</b>                                | 0.49-0.90     |          | 0.57                                      | 0.33-0.80     | -        | -              |

**Supplementary Table 11 Results of multivariate logistic regression model for all-cause mortality (Yes/ No) in Cohort 1 and Cohort 2 at 5 years and raw 25OHD**

| <b>Cohort 1</b>                | <b>Odds ratio</b> | <b>P value</b> |
|--------------------------------|-------------------|----------------|
| 25OHD (per 1 nmol/l increment) | 0.99              | 0.02           |
| SampleMonth2                   | 0.80              | 0.48           |
| SampleMonth3                   | 0.67              | 0.23           |
| SampleMonth4                   | 0.62              | 0.16           |
| SampleMonth5                   | 1.62              | 0.12           |
| SampleMonth6                   | 0.97              | 0.93           |
| SampleMonth7                   | 1.04              | 0.90           |
| SampleMonth8                   | 0.78              | 0.47           |
| SampleMonth9                   | 0.79              | 0.51           |
| SampleMonth10                  | 0.77              | 0.42           |
| SampleMonth11                  | 0.92              | 0.78           |
| SampleMonth12                  | 0.79              | 0.49           |
| Age                            | 1.02              | 0.01           |
| Sex (M)                        | 1.22              | 0.14           |
| AJCC                           | 2.67              | 2.9e-24        |
| Sampling less than 12 months   | 0.96              | 0.87           |
| CRC Site (Rectum)              | 1.44              | 0.01           |
| <b>Cohort 2</b>                |                   |                |
| 25OHD (per 1 nmol/l increment) | 0.99              | 0.015          |
| SampleMonth2                   | 0.30              | 0.03           |
| SampleMonth3                   | 0.70              | 0.41           |
| SampleMonth4                   | 0.53              | 0.18           |
| SampleMonth5                   | 0.76              | 0.56           |
| SampleMonth6                   | 0.92              | 0.86           |
| SampleMonth7                   | 0.79              | 0.66           |
| SampleMonth8                   | 1.15              | 0.77           |
| SampleMonth9                   | 1.15              | 0.77           |
| SampleMonth10                  | 0.77              | 0.60           |
| SampleMonth11                  | 0.64              | 0.35           |
| SampleMonth12                  | 0.69              | 0.53           |
| Age                            | 1.04              | 2.14e-04       |
| Sex (M)                        | 1.21              | 0.38           |
| AJCC                           | 2.35              | 1.89e-08       |
| Sampling less than 12 months   | 9.12              | 4.33e-11       |
| CRC Site (Rectum)              | 1.35              | 0.18           |

**Supplementary Table 12 AUC for survival model for all-cause mortality at 5 years without and with raw 25OHD**

*\*P value calculated using ANOVA likelihood ratio test of difference between two logistic regression models. Sample time reflects sample time from surgery (< >12 months)*

| Cohort              | N    | Model 1<br>AJCC +<br>sample<br>time +<br>sample<br>month | Model 2<br>AJCC, age,<br>gender, BMI,<br>cancer site<br>+sample time<br>+ sample<br>month | Model 3<br>All clinical<br>variables +<br>25OHD +<br>sample<br>month | P value*<br><u>Model 1 vs</u><br><u>Model 3</u> | P value*<br><u>Model 2 vs</u><br><u>Model 3</u> |
|---------------------|------|----------------------------------------------------------|-------------------------------------------------------------------------------------------|----------------------------------------------------------------------|-------------------------------------------------|-------------------------------------------------|
| <b>CRC Cohort 1</b> | 1687 | 0.68                                                     | 0.718                                                                                     | 0.723                                                                | <u>5.9e-8</u>                                   | <u>0.04</u>                                     |
| <b>CRC Cohort 2</b> | 585  | 0.71                                                     | 0.74                                                                                      | 0.77                                                                 | <u>0.0002</u>                                   | <u>0.01</u>                                     |
